# Supplementary material
Source: HighWire-hosted journal article supplement (https://www.life-science-alliance.org/content/1/5/e201800111/F4)

- **Fig 4F-gel.** Wet stained gel scanned in B/W mode for better contrast.
  - **Fig 4F-1.** Western blot using anti-thioredoxin Ab (expression tag). This is a replicate experiment (not shown in manuscript Fig. 4F) of Fig 4F-2.
  - **Fig 4F-2.** Western blot using anti-thioredoxin Ab.
  - **Fig 4-anti-CD68.** The membrane shown in Fig. 4F-2 was further incubated with anti-CD68 antibody and anti-mouse IgG secondary antibody. The anti-CD68 recognizes a 100~110 kDa protein (boxed). This was cropped to exclude the strong background bands of mouse IgG used for immuno-precipitation.
- *[Alkaline phosphatase]-conjugated secondary Abs were used for colorimetric detection for all Western blots . The boxed areas are shown in manuscript Fig. 4F.*

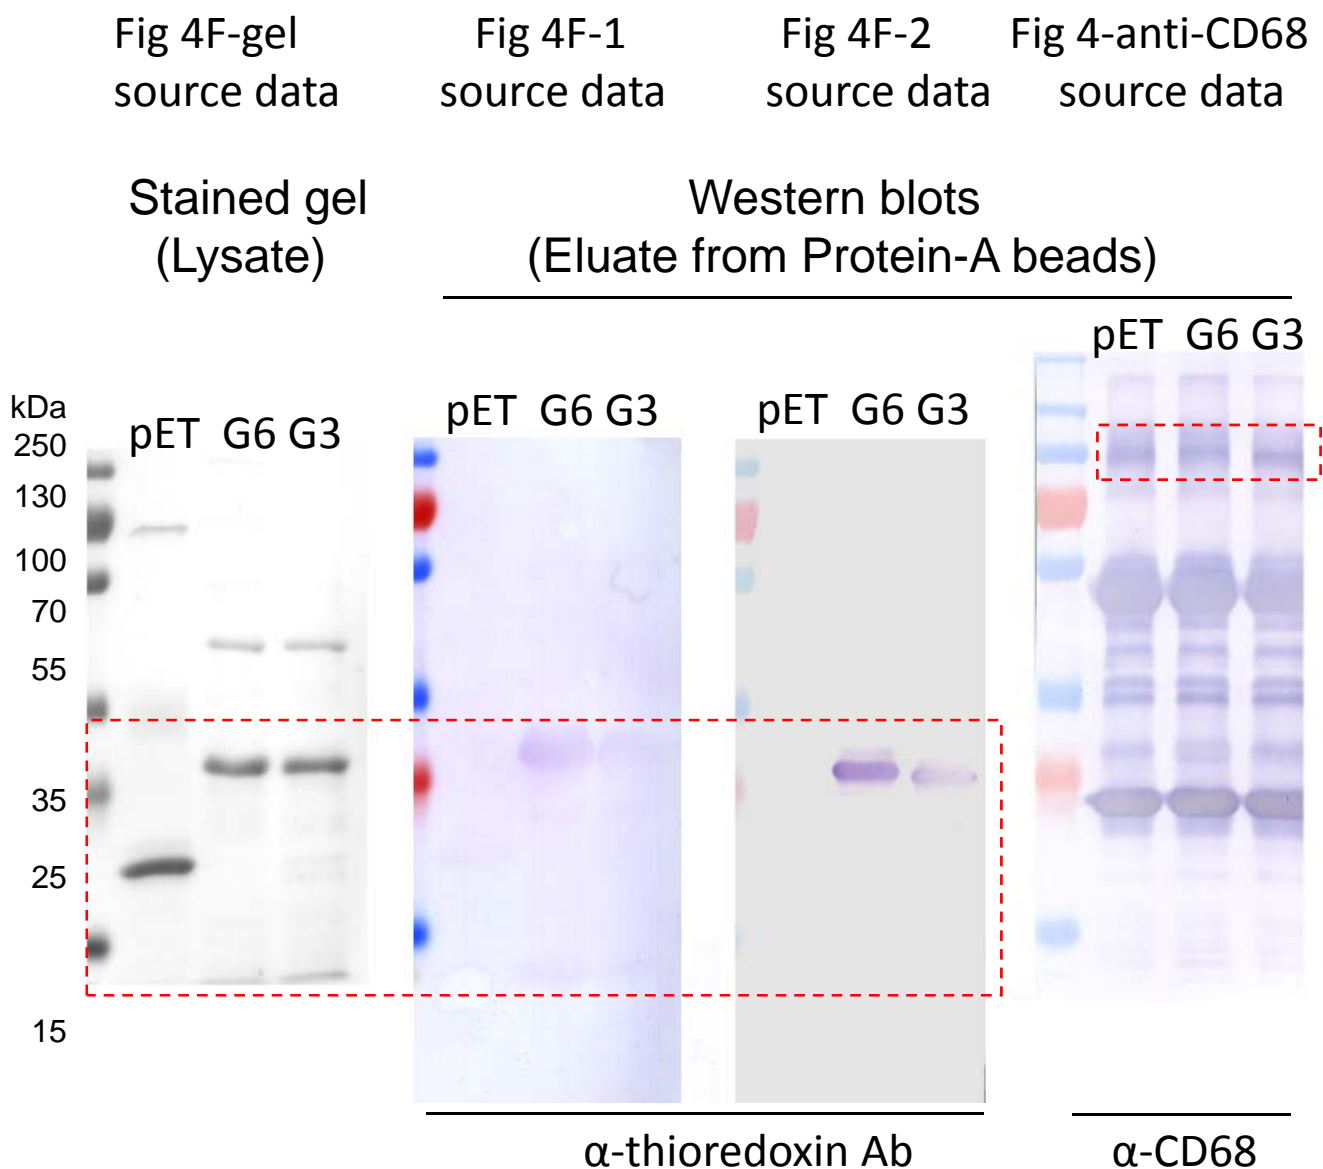

Supplement: inline-supplementary-material-1 [file inline-supplementary-material-1.zip]
